# Supplementary material for: Ranging Behavior of Non-Breeding and Breeding Adult White-Tailed Eagles
Source: MDPI journal article supplement (doi:10.3390/d15121208), 2023-12-08
Supplement: s1 [file s1]

**Table S1.** Productivity (number of chicks fledged) of White-tailed eagle breeding males during the tracking period. Zeros mean unsuccessful breeding.

|        | 2018 | 2019   | 2020 | 2021 | 2022 | 2023 |
|--------|------|--------|------|------|------|------|
| BIEL05 | 0    | min. 1 | 1    | 1    | 0    |      |
| HALB11 |      |        |      | 0    | 2    | 0    |

**Table S2.** Summary of generalized additive models on daily distance covered by White-tailed eagle breeders and floaters across the year. Individual variability was incorporated as random effect.

| Daily movement of breeders |          |                |          |
|----------------------------|----------|----------------|----------|
| Predictors                 | Estimate | Standard error | <i>P</i> |
| (Intercept)                | 0.096    | 0.023          | <0.001   |
| s(day of the year)         | 7.842    |                | <0.0001  |
| s(individual)              | 0.99     |                | <0.0001  |
| Observations               | 2610     |                |          |
| Adjusted R <sup>2</sup>    | 0.298    |                |          |

  

| Daily movement of floaters |          |                |          |
|----------------------------|----------|----------------|----------|
|                            | Estimate | Standard error | <i>P</i> |
| (Intercept)                | 0.056    | 0.007          | <0.0001  |
| s(day of the year)         | 5.03     |                | <0.0001  |
| s(individual)              | 3.54     |                | <0.0001  |
| Observations               | 1786     |                |          |
| Adjusted R <sup>2</sup>    | 0.044    |                |          |

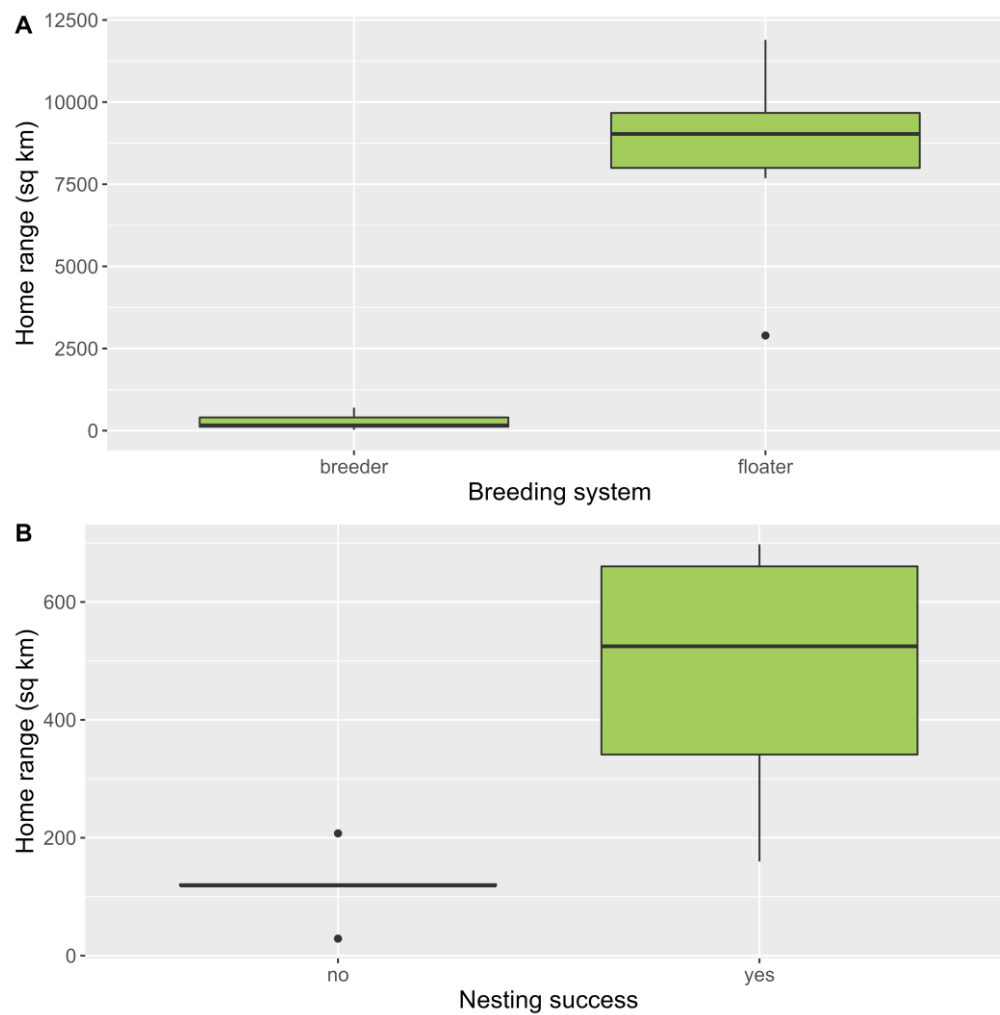

**Figure S1.** Comparison of 95% kernel density estimated home ranges of White-tailed eagle breeders and floaters (A) and successfully and unsuccessfully breeding males (B).

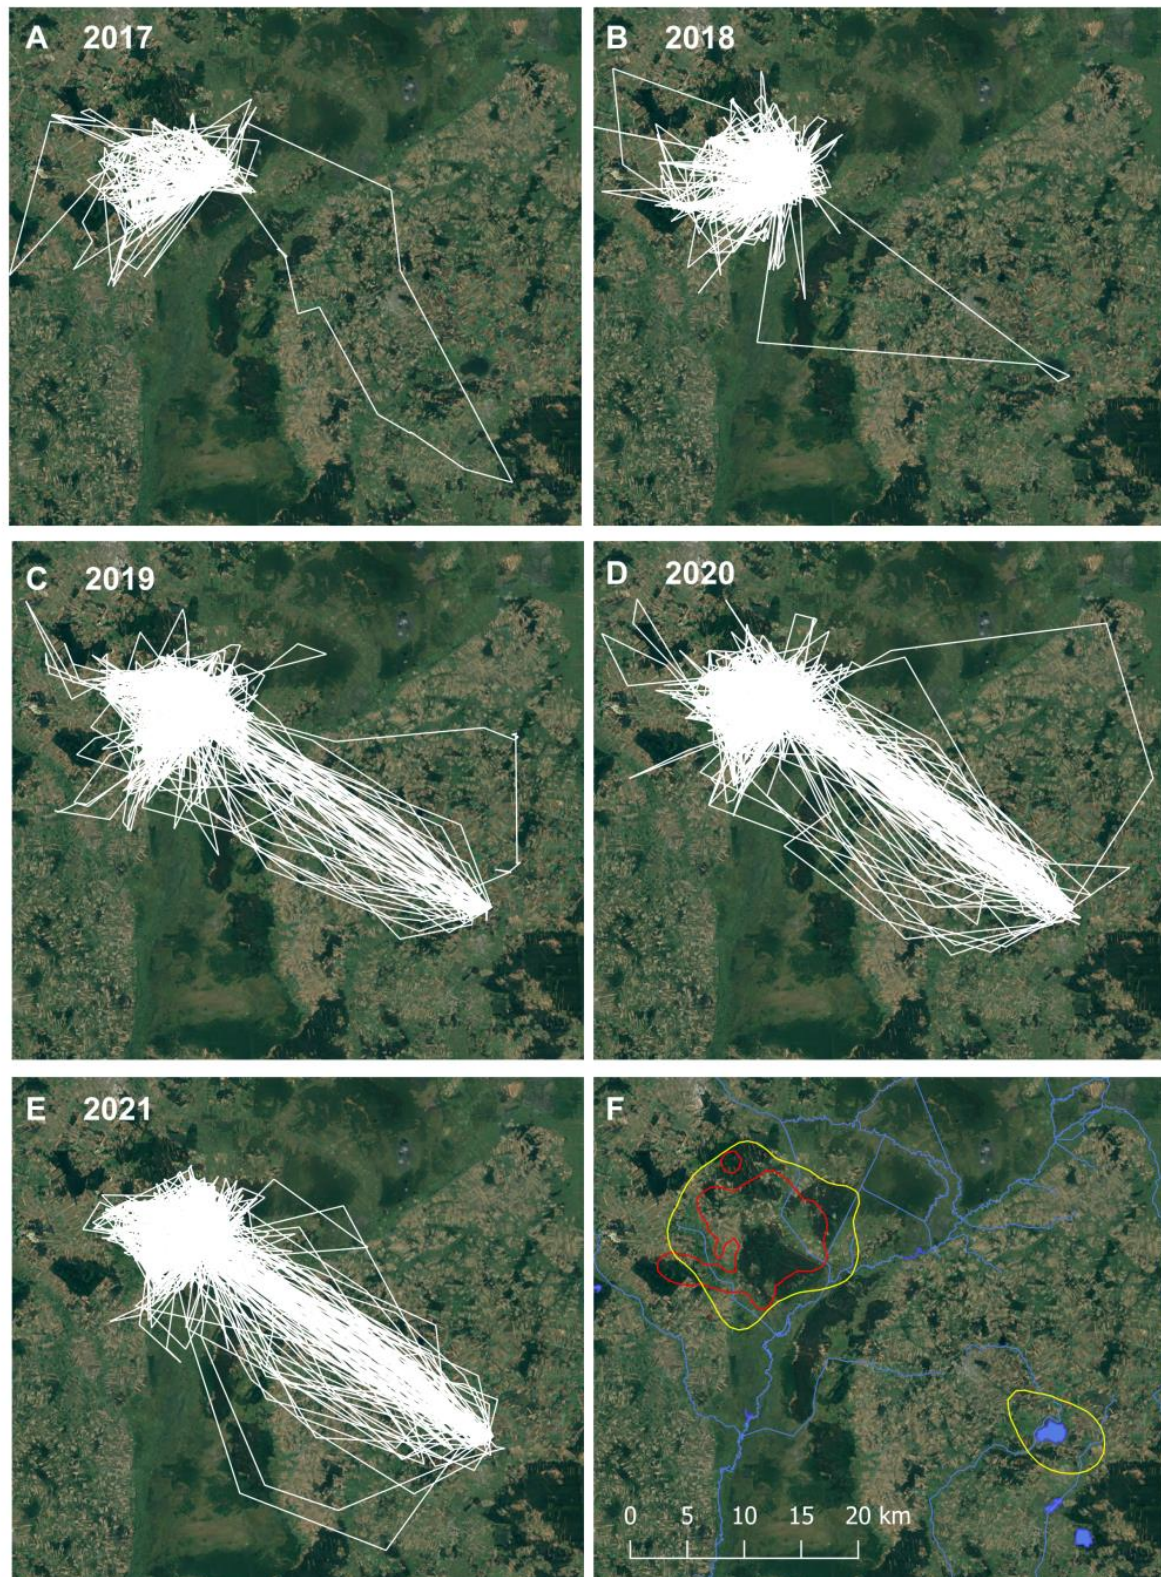

**Figure S2.** Movements of White-tailed eagle male (BIEL05) in years when nesting failed (A, B) and when it was successful (C, D, E); kde95% home range in sample successful and unsuccessful breeding seasons on the background of potential foraging sites represented by rivers and waterbodies (F).
