# Supplementary material for: Ranging Behavior of Non-Breeding and Breeding Adult White-Tailed Eagles
Source: MDPI journal article supplement (doi:10.3390/d15121208), 2023-12-08
Supplement: s1 [file s1]

Archive with 1 entries (1 files):
- diversity-2725633-supplementary.pdf
